# Supplementary material
Source: Springer Nature journal article supplement (https://www.springermedizin.de/resource/supplementary/13075_2013_4065_MOESM7_ESM.pdf/9695970)

**A**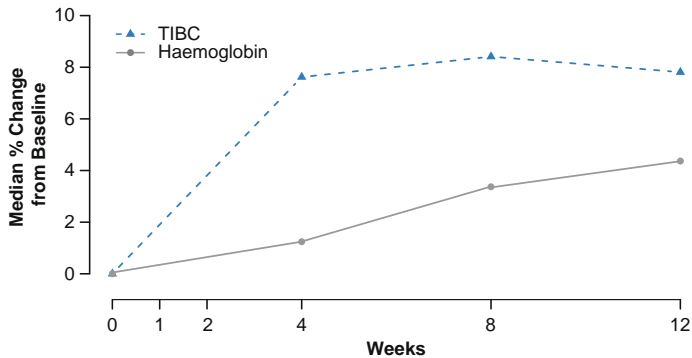**B**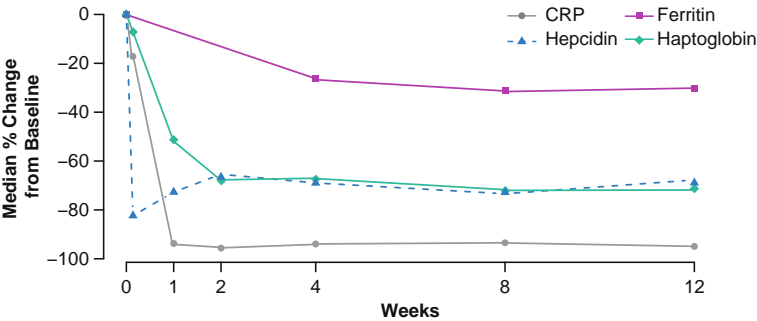

Supplement: MOESM7 [file 9695970]
